# Supplementary material
Source: PubMed Central journal article supplement (PMC4766076)
Supplement: NIHMS754007-supplement-Supplemental_Tables.pdf [file NIHMS754007-supplement-Supplemental_Tables.pdf]

## Supplemental Material

Supplemental Table I. Distribution of Baseline Characteristics by IL6 Quartile

| Characteristic        | IL6 by Quartile<br>N=1016 |                      |                      |                      | P value |
|-----------------------|---------------------------|----------------------|----------------------|----------------------|---------|
|                       | Quartile1<br>(n=254)      | Quartile2<br>(n=254) | Quartile3<br>(n=254) | Quartile4<br>(n=254) |         |
| Age                   | N (%)                     |                      |                      |                      |         |
| <50                   | 38(36.19)                 | 25(23.81)            | 17(16.19)            | 25(23.81)            | 0.10    |
| 50-65                 | 119(24.24)                | 117(23.83)           | 127(25.87)           | 128(26.07)           |         |
| >65-75                | 63(24.42)                 | 75(29.07)            | 58(22.48)            | 62(24.03)            |         |
| >75                   | 34(20.99)                 | 37(22.84)            | 52(32.1)             | 39(24.07)            |         |
| Gender                |                           |                      |                      |                      |         |
| Male                  | 168(26.54)                | 170(26.86)           | 148(23.38)           | 147(23.22)           | 0.01    |
| Female                | 86(22.45)                 | 84(21.93)            | 106(27.68)           | 107(27.94)           |         |
| Race                  |                           |                      |                      |                      |         |
| Hispanic              | 64(21.55)                 | 73(24.58)            | 77(25.93)            | 83(27.95)            | 0.19    |
| Non-Hispanic<br>White | 143(27.61)                | 125(24.13)           | 135(26.06)           | 115(22.2)            |         |
| Black                 | 44(23.78)                 | 52(28.11)            | 36(19.46)            | 53(28.65)            |         |
| Other                 | 3(18.75)                  | 4(25)                | 6(37.5)              | 3(18.75)             |         |
| Region                |                           |                      |                      |                      |         |
| United States         | 158(25.99)                | 152(25)              | 152(25)              | 146(24.01)           | 0.07    |
| Canada                | 15(27.27)                 | 14(25.45)            | 14(25.45)            | 12(21.82)            |         |
| Latin America         | 41(18.89)                 | 55(25.35)            | 55(25.35)            | 66(30.41)            |         |
| Spain                 | 40(29.41)                 | 33(24.26)            | 33(24.26)            | 30(22.06)            |         |
| Hypertension          |                           |                      |                      |                      |         |
| Yes                   | 219(23.91)                | 236(25.76)           | 224(24.45)           | 237(25.87)           | 0.05    |
| No                    | 35(35)                    | 18(18)               | 30(30)               | 17(17)               |         |
| Smoking               |                           |                      |                      |                      |         |
| Never                 | 114(27.54)                | 101(24.4)            | 98(23.67)            | 101(24.4)            | 0.01    |
| Former                | 102(25.82)                | 104(26.33)           | 101(25.57)           | 88(22.28)            |         |
| Current               | 38(18.36)                 | 49(23.67)            | 55(26.57)            | 65(31.4)             |         |
| Ischemic<br>Disease   |                           |                      |                      |                      |         |
| Yes                   | 19(23.46)                 | 20(24.69)            | 22(27.16)            | 20(24.69)            | 0.80    |
| No                    | 235(25.13)                | 234(25.03)           | 232(24.81)           | 234(25.03)           |         |
| Diabetes<br>Mellitus  |                           |                      |                      |                      |         |
| Yes                   | 81(21.83)                 | 93(25.07)            | 103(27.76)           | 94(25.34)            | 0.15    |
| No                    | 173(26.82)                | 161(24.96)           | 151(23.41)           | 160(24.81)           |         |
| Labs                  | Mean (SD)                 |                      |                      |                      |         |
| LDL                   | 109.0±39.4                | 113.2±40.0           | 114.0±37.9           | 115.9±40.8           | 0.26    |
| HDL                   | 48.0±14.8                 | 43.7±13.1            | 44.9±19.0            | 44.6±24.1            | 0.05    |

Supplemental Table II. Distribution of Baseline Characteristics by MCP1 Quartile

| Characteristic    | MCP1 by Quartile<br>N=628 |                      |                      |                      | P value |
|-------------------|---------------------------|----------------------|----------------------|----------------------|---------|
|                   | Quartile1<br>(n=157)      | Quartile2<br>(n=157) | Quartile3<br>(n=157) | Quartile4<br>(n=157) |         |
| Age               | N (%)                     |                      |                      |                      |         |
| <50               | 27(38.57)                 | 20(28.57)            | 13(18.57)            | 10(14.29)            | <.01    |
| 50-65             | 82(26.37)                 | 77(24.76)            | 71(22.83)            | 81(26.05)            |         |
| >65-75            | 32(20.65)                 | 34(21.94)            | 48(30.97)            | 41(26.45)            |         |
| >75               | 16(17.39)                 | 26(28.26)            | 25(27.17)            | 25(27.17)            |         |
| Gender            |                           |                      |                      |                      |         |
| Male              | 90(23.2)                  | 98(25.26)            | 99(25.52)            | 101(26.03)           | 0.21    |
| Female            | 67(27.92)                 | 59(24.58)            | 58(24.17)            | 56(23.33)            |         |
| Race              |                           |                      |                      |                      |         |
| Hispanic          | 27(17.2)                  | 45(28.66)            | 46(29.3)             | 39(24.84)            | <.01    |
| Non-Hispanic      | 58(17.68)                 | 83(25.3)             | 93(28.35)            | 94(28.66)            |         |
| White             |                           |                      |                      |                      |         |
| Black             | 70(53.03)                 | 25(18.94)            | 15(11.36)            | 22(16.67)            |         |
| Other             | 2(18.18)                  | 4(36.36)             | 3(27.27)             | 2(18.18)             |         |
| Region            |                           |                      |                      |                      |         |
| United States     | 131(31.41)                | 100(23.98)           | 87(20.86)            | 99(23.74)            | <.01    |
| Canada            | 7(31.82)                  | 6(27.27)             | 5(22.73)             | 4(18.18)             |         |
| Latin America     | 10(9.52)                  | 33(31.43)            | 38(36.19)            | 24(22.86)            |         |
| Spain             | 9(10.71)                  | 18(21.43)            | 27(32.14)            | 30(35.71)            |         |
| Hypertension      |                           |                      |                      |                      |         |
| Yes               | 149(26.09)                | 137(23.99)           | 143(25.04)           | 142(24.87)           | 0.35    |
| No                | 8(14.04)                  | 20(35.09)            | 14(24.56)            | 15(26.32)            |         |
| Smoking           |                           |                      |                      |                      |         |
| Never             | 63(25.51)                 | 62(25.1)             | 62(25.1)             | 60(24.29)            | 0.89    |
| Former            | 63(24.9)                  | 63(24.9)             | 58(22.92)            | 69(27.27)            |         |
| Current           | 31(24.22)                 | 32(25)               | 37(28.91)            | 28(21.88)            |         |
| Ischemic Disease  |                           |                      |                      |                      |         |
| Yes               | 12(21.05)                 | 20(35.09)            | 7(12.28)             | 18(31.58)            | 0.76    |
| No                | 145(25.39)                | 137(23.99)           | 150(26.27)           | 139(24.34)           |         |
| Diabetes Mellitus |                           |                      |                      |                      |         |
| Yes               | 65(26.75)                 | 59(24.28)            | 56(23.05)            | 63(25.93)            | 0.74    |
| No                | 92(23.9)                  | 98(25.45)            | 101(26.23)           | 94(24.42)            |         |
| Labs              | Mean (SD)                 |                      |                      |                      |         |
| LDL               | 113.0±42.0                | 113.2±33.2           | 112.5±35.8           | 114.4±42.7           | 0.98    |
| HDL               | 45.7±16.0                 | 45.9±17.7            | 45.4±14.4            | 45.3±17.6            | 0.98    |

Supplemental Table III. Distribution of Baseline Characteristics by SAA Quartile

| Characteristic        | SAA by Quartile<br>N=1008 |                      |                      |                      | P value |
|-----------------------|---------------------------|----------------------|----------------------|----------------------|---------|
|                       | Quartile1<br>(n=253)      | Quartile2<br>(n=251) | Quartile3<br>(n=254) | Quartile4<br>(n=250) |         |
| Age                   | N (%)                     |                      |                      |                      |         |
| <50                   | 23(22.12)                 | 27(25.96)            | 32(30.77)            | 22(21.15)            | 0.09    |
| 50-65                 | 120(24.64)                | 113(23.2)            | 117(24.02)           | 137(28.13)           |         |
| >65-75                | 77(30.08)                 | 65(25.39)            | 63(24.61)            | 51(19.92)            |         |
| >75                   | 33(20.5)                  | 46(28.57)            | 42(26.09)            | 40(24.84)            |         |
| Gender                |                           |                      |                      |                      |         |
| Male                  | 178(28.34)                | 163(25.96)           | 160(25.48)           | 127(20.22)           | <.01    |
| Female                | 75(19.74)                 | 88(23.16)            | 94(24.74)            | 123(32.37)           |         |
| Race                  |                           |                      |                      |                      |         |
| Hispanic              | 81(27.27)                 | 82(27.61)            | 65(21.89)            | 69(23.23)            | 0.18    |
| Non-Hispanic<br>White | 126(24.56)                | 125(24.37)           | 143(27.88)           | 119(23.2)            |         |
| Black                 | 43(23.63)                 | 37(20.33)            | 44(24.18)            | 58(31.87)            |         |
| Other                 | 3(18.75)                  | 7(43.75)             | 2(12.5)              | 4(25)                |         |
| Region                |                           |                      |                      |                      |         |
| United States         | 135(22.35)                | 145(24.01)           | 160(26.49)           | 164(27.15)           | 0.02    |
| Canada                | 12(23.08)                 | 15(28.85)            | 19(36.54)            | 6(11.54)             |         |
| Latin America         | 66(30.41)                 | 60(27.65)            | 42(19.35)            | 49(22.58)            |         |
| Spain                 | 40(29.63)                 | 31(22.96)            | 33(24.44)            | 31(22.96)            |         |
| Hypertension          |                           |                      |                      |                      | 0.10    |
| Yes                   | 224(24.64)                | 224(24.64)           | 229(25.19)           | 232(25.52)           |         |
| No                    | 29(29.29)                 | 27(27.27)            | 25(25.25)            | 18(18.18)            |         |
| Smoking               |                           |                      |                      |                      | 0.10    |
| Never                 | 97(23.54)                 | 108(26.21)           | 105(25.49)           | 102(24.76)           |         |
| Former                | 109(27.81)                | 104(26.53)           | 86(21.94)            | 93(23.72)            |         |
| Current               | 47(23.04)                 | 39(19.12)            | 63(30.88)            | 55(26.96)            |         |
| Ischemic Disease      |                           |                      |                      |                      | 0.55    |
| Yes                   | 17(20.99)                 | 22(27.16)            | 21(25.93)            | 21(25.93)            |         |
| No                    | 236(25.46)                | 229(24.7)            | 233(25.13)           | 229(24.7)            |         |
| Diabetes Mellitus     |                           |                      |                      |                      | 0.13    |
| Yes                   | 78(21.2)                  | 102(27.72)           | 89(24.18)            | 99(26.9)             |         |
| No                    | 175(27.34)                | 149(23.28)           | 165(25.78)           | 151(23.59)           |         |
| Labs                  | Mean (SD)                 |                      |                      |                      |         |
| LDL                   | 111.7±38.4                | 108.8±41.0           | 115.5±39.2           | 115.7±39.4           | 0.16    |
| HDL                   | 44.1±14.2                 | 43.5±11.9            | 48.3±27.9            | 45.5±14.3            | 0.02    |

Supplemental Table IV. Distribution of Baseline Characteristics by TNFR1 Quartile

| Characteristic        | TNFR1 by Quartile    |                      |                      |                      | P value |
|-----------------------|----------------------|----------------------|----------------------|----------------------|---------|
|                       | Quartile1<br>(n=254) | Quartile2<br>(n=254) | Quartile3<br>(n=255) | Quartile4<br>(n=254) |         |
| Age                   | N (%)                |                      |                      |                      |         |
| <50                   | 38(36.19)            | 27(25.71)            | 22(20.95)            | 18(17.14)            | <.01    |
| 50-65                 | 129(26.22)           | 135(27.44)           | 114(23.17)           | 114(23.17)           |         |
| >65-75                | 61(23.64)            | 57(22.09)            | 73(28.29)            | 67(25.97)            |         |
| >75                   | 26(16.05)            | 35(21.6)             | 46(28.4)             | 55(33.95)            |         |
| Gender                |                      |                      |                      |                      |         |
| Male                  | 168(26.54)           | 166(26.22)           | 163(25.75)           | 136(21.48)           | <.01    |
| Female                | 86(22.4)             | 88(22.92)            | 92(23.96)            | 118(30.73)           |         |
| Race                  |                      |                      |                      |                      |         |
| Hispanic              | 79(26.6)             | 74(24.92)            | 82(27.61)            | 62(20.88)            | 0.17    |
| Non-Hispanic<br>White | 125(24.13)           | 130(25.1)            | 124(23.94)           | 139(26.83)           |         |
| Black                 | 45(24.32)            | 42(22.7)             | 47(25.41)            | 51(27.57)            |         |
| Other                 | 5(29.41)             | 8(47.06)             | 2(11.76)             | 2(11.76)             |         |
| Region                |                      |                      |                      |                      |         |
| United States         | 147(24.18)           | 144(23.68)           | 147(24.18)           | 170(27.96)           | 0.02    |
| Canada                | 19(33.93)            | 19(33.93)            | 9(16.07)             | 9(16.07)             |         |
| Latin America         | 57(26.27)            | 57(26.27)            | 63(29.03)            | 40(18.43)            |         |
| Spain                 | 31(22.79)            | 34(25)               | 36(26.47)            | 35(25.74)            |         |
| Hypertension          |                      |                      |                      |                      |         |
| Yes                   | 223(24.32)           | 226(24.65)           | 232(25.3)            | 236(25.74)           | 0.04    |
| No                    | 31(31)               | 28(28)               | 23(23)               | 18(18)               |         |
| Smoking               |                      |                      |                      |                      |         |
| Never                 | 111(26.75)           | 104(25.06)           | 101(24.34)           | 99(23.86)            | 0.53    |
| Former                | 89(22.53)            | 102(25.82)           | 108(27.34)           | 96(24.3)             |         |
| Current               | 54(26.09)            | 48(23.19)            | 46(22.22)            | 59(28.5)             |         |
| Ischemic Disease      |                      |                      |                      |                      |         |
| Yes                   | 18(21.95)            | 20(24.39)            | 23(28.05)            | 21(25.61)            | 0.54    |
| No                    | 236(25.24)           | 234(25.03)           | 232(24.81)           | 233(24.92)           |         |
| Diabetes Mellitus     |                      |                      |                      |                      |         |
| Yes                   | 71(19.09)            | 73(19.62)            | 98(26.34)            | 130(34.95)           | <.01    |
| No                    | 183(28.37)           | 181(28.06)           | 157(24.34)           | 124(19.22)           |         |
| Labs                  | Mean (SD)            |                      |                      |                      |         |
| LDL                   | 115.9±40.0           | 111.6±37.2           | 114.0±40.3           | 110.4±40.7           | 0.42    |
| HDL                   | 45.1±13.1            | 45.5±16.8            | 45.3±16.4            | 45.4±24.9            | 0.99    |

Supplemental Table V. Distribution of Baseline Characteristics by CD40L Quartile

| Characteristic     | CD40L by Quartiles<br>N=1015 |                      |                      |                      | p-value |
|--------------------|------------------------------|----------------------|----------------------|----------------------|---------|
|                    | Quartile1<br>(n=253)         | Quartile2<br>(n=254) | Quartile3<br>(n=254) | Quartile4<br>(n=254) |         |
| Age                | N (%)                        |                      |                      |                      |         |
| <50                | 29(27.88)                    | 26(25)               | 24(23.08)            | 25(24.04)            | 0.22    |
| 50-65              | 135(27.44)                   | 120(24.39)           | 120(24.39)           | 117(23.78)           |         |
| >65-75             | 56(21.79)                    | 62(24.12)            | 64(24.9)             | 75(29.18)            |         |
| >75                | 33(20.37)                    | 46(28.4)             | 46(28.4)             | 37(22.84)            |         |
| Gender             |                              |                      |                      |                      |         |
| Male               | 162(25.63)                   | 157(24.84)           | 159(25.16)           | 154(24.37)           | 0.49    |
| Female             | 91(23.76)                    | 97(25.33)            | 95(24.8)             | 100(26.11)           |         |
| Race               |                              |                      |                      |                      |         |
| Hispanic           | 41(13.8)                     | 47(15.82)            | 86(28.96)            | 123(41.41)           | <.01    |
| Non-Hispanic White | 143(27.66)                   | 142(27.47)           | 128(24.76)           | 104(20.12)           |         |
| Black              | 64(34.78)                    | 57(30.98)            | 37(20.11)            | 26(14.13)            |         |
| Other              | 5(29.41)                     | 8(47.06)             | 3(17.65)             | 1(5.88)              |         |
| Region             |                              |                      |                      |                      |         |
| United States      | 184(30.36)                   | 175(28.88)           | 138(22.77)           | 109(17.99)           | <.01    |
| Canada             | 22(39.29)                    | 10(17.86)            | 12(21.43)            | 12(21.43)            |         |
| Latin America      | 13(5.99)                     | 32(14.75)            | 68(31.34)            | 104(47.93)           |         |
| Spain              | 34(25)                       | 37(27.21)            | 36(26.47)            | 29(21.32)            |         |
| Hypertension       |                              |                      |                      |                      |         |
| Yes                | 234(25.57)                   | 236(25.79)           | 224(24.48)           | 221(24.15)           | 0.01    |
| No                 | 19(19)                       | 18(18)               | 30(30)               | 33(33)               |         |
| Smoking            |                              |                      |                      |                      |         |
| Never              | 89(21.45)                    | 105(25.3)            | 107(25.78)           | 114(27.47)           | 0.08    |
| Former             | 106(26.9)                    | 102(25.89)           | 101(25.63)           | 85(21.57)            |         |
| Current            | 58(28.16)                    | 47(22.82)            | 46(22.33)            | 55(26.7)             |         |
| Ischemic Disease   |                              |                      |                      |                      |         |
| Yes                | 31(37.8)                     | 26(31.71)            | 14(17.07)            | 11(13.41)            | <.01    |
| No                 | 222(23.79)                   | 228(24.44)           | 240(25.72)           | 243(26.05)           |         |
| Diabetes Mellitus  |                              |                      |                      |                      |         |
| Yes                | 107(28.84)                   | 94(25.34)            | 96(25.88)            | 74(19.95)            | <.01    |
| No                 | 146(22.67)                   | 160(24.84)           | 158(24.53)           | 180(27.95)           |         |
| Labs               | Mean (SD)                    |                      |                      |                      |         |
| LDL                | 114.9±37.5                   | 117.1±38.5           | 111.4±42.1           | 108.3±39.6           | 0.07    |
| HDL                | 46.4±19.9                    | 46.5±24.2            | 43.9±12.3            | 44.5±14.4            | 0.29    |
